# Supplementary material for: Genetic Diversity and Distribution Patterns of Host Insects of Caterpillar Fungus Ophiocordyceps sinensis in the Qinghai-Tibet Plateau
Source: PLoS One. 2014 Mar 25;9(3):e92293. doi: 10.1371/journal.pone.0092293 (PMC3965410; doi:10.1371/journal.pone.0092293)
Supplement: Table S2 — GenBank accession numbers and haplotype frequencies in the populations included in the study. Population codes correspond to those in Table S1 and Figure 1. (XLSX) [file pone.0092293.s002.xlsx]

## Sheet: Sheet1
P	H1	H2	H3	H4	H5	H6	H7	H8	H9	H10	H11	H12	H13	H14	H15	H16	H17	H18	H19	H20	H21	H22	H23	H24	H25	H26	H27	H28	H29	H30	H31	H32	H33	H34	H35	H36	H37	H38	H39	H40	H41	H42	H43	H44	H45	H46	H47	H48	H49
1LSDQ	5
2SN		3	1	1	2	3
3RDG	5
4RNML	4						1
5RYD											5
6LZCY															4	1
7NQS															2									1	1	1
8NQBQ															4												1
9NQNR															4													1
10NQ															2													2	1
11NQJL															4																1
12LZL	2																															1	1	1
13GUD																										4									4
14YS																										9										2
15HN																										9
16MQ																										11
17GD																										8											1	1	1
18TD																																			7					1
19QML																										11
20SD																										3															1	1
21GN																									1	7									1								1
22HZ																																			6
23ZD															6											4																		1
24XH																										3									4								1		1	1
25KD																																															8	1
26SQ																										8																							1
27HY																										1									8
28LL															5
29DQ															7									1
30BR															9									1						1
31DR																										9
32DZ	7																						1
33LZ																	5	2	3
34ML
35GK
36GB	4							1	3	1		2	1	1						2	2	1	1
37LQ																										6
38QL
39GH
40GC
41TJ
42SG
43TQ
Total	27	3	1	1	2	3	1	1	3	1	5	2	1	1	47	1	5	2	3	2	2	1	2	3	2	94	1	3	1	1	1	1	1	1	30	2	1	1	1	1	1	1	2	1	1	1	8	1	1
GenBank accession numbers	KC994913	KC994914	KC994915	KC994916	KC994917	KC994918	KC994919	KC994920	KC994921	KC994922	KC994923	KC994924	KC994925	KC994926	KC994927	KC994928	KC994929	KC994930	KC994931	KC994932	KC994933	KC994934	KC994935	KC994936	KC994937	KC994938	KC994939	KC994940	KC994941	KC994942	KC994943	KC994944	KC994945	KC994946	KC994947	KC994948	KC994949	KC994950	KC994951	KC994952	KC994953	KC994954	KC994955	KC994956	KC994957	KC994958	KC994959	KC994960	KC994961
[truncated: 42 more columns]
